# Supplementary material for: Fluorescent silver nanoclusters in hybridized DNA duplexes for the turn-on detection of Hg2+ ions
Source: Royal Society of Chemistry journal article supplement (doi:10.1039/c1cc14012d), 2011-01-01
Supplement: c1cc14012d.pdf [file c1cc14012d.pdf]

## Supporting Information

### Fluorescent Silver Nanoclusters in Hybridized DNA Duplexes for the Turn on Detection of $\text{Hg}^{2+}$ ion

Liu Deng, Zhixue Zhou, Tao Li and Shaojun Dong\*

*State Key Laboratory of Electroanalytical Chemistry, Changchun Institute of Applied  
Chemistry, Chinese Academy of Sciences, Changchun, Jilin, 130022, China, and Graduate  
School of the Chinese Academy of Sciences, Beijing, 100039, China.*

*E-mail: dongsj@ciac.jl.cn, ekwang@ciac.jl.cn*

#### 1. Experimental

#### 2. FL spectra of Str-A/Str-B/ $\text{Hg}^{2+}$ system

Figure S1

#### 3. UV spectra of Str-A/Str-B/ $\text{Hg}^{2+}$ system

Figure S2

#### 4. $T_m$ spectra of Str-A/Str-B/ $\text{Hg}^{2+}$ system

Figure S3

#### 5. The effect of different Str-B on the fluorescence of Str-A/Str-B/ $\text{Hg}^{2+}$ system

Figure S4

#### 6. The effect of pH on the fluorescence of Str-A/Str-B/ $\text{Hg}^{2+}$ system

Figure S5

#### 7. The oligonucleotide sequences applied in this work

Table S1

#### 8. The results of the proposed method in the practical samples

Table S2

#### 1. Experimental

1.1 Materials and preparation: All DNA strands were synthesized by Shanghai Sangon Biotechnology Co. Ltd. (Shanghai, China). Other chemicals were commercially available and of analytical grade. All DNA samples were prepared with phosphate buffer (20 mM phosphate, 1

mM magnesium acetate, pH 7.0). All the solutions were prepared with water purified by a Milli-Q system (Millipore, Bedford, MA, USA) and stored at 4 °C. In a typical hybridization experiment, 2 μM probe DNA was first mixed with 2 μM Str-A or Str-B, respectively. Then DNA mixture solutions were denatured at 95 °C for 15 minutes, followed with a slow annealing treatment for 1 hour to form DNA duplex. Then, different concentrations of Hg<sup>2+</sup> were added to this solution respectively, and the mixture was allowed to incubate at 25 °C for 1 h. Next, AgNO<sub>3</sub> [6:1 Ag<sup>+</sup>/DNA molar ratio] was added to the DNA duplex solutions. After mixing, the solutions were stirred for 15 min and then reduced with NaBH<sub>4</sub> [1:1 Ag<sup>+</sup>/NaBH<sub>4</sub> molar ratio] for another 7 hours.

1.2 Characterization: The FL spectra were recorded by a Perkin-Elmer LS55 Luminescence Spectrometer (Perkin-Elmer Instruments U.K.) using a 1-cm path length quartz cell at room temperature. The slot widths of the excitation and emission both were set at 10.0 nm. UV/vis absorption spectra were recorded by a CARY 500 UV/vis-near-IR Varian spectrophotometer. The melting point was determined from the first derivative plot of absorption versus temperature curve.

## 2. FL spectra of Str-A/Str-B/Hg<sup>2+</sup> system

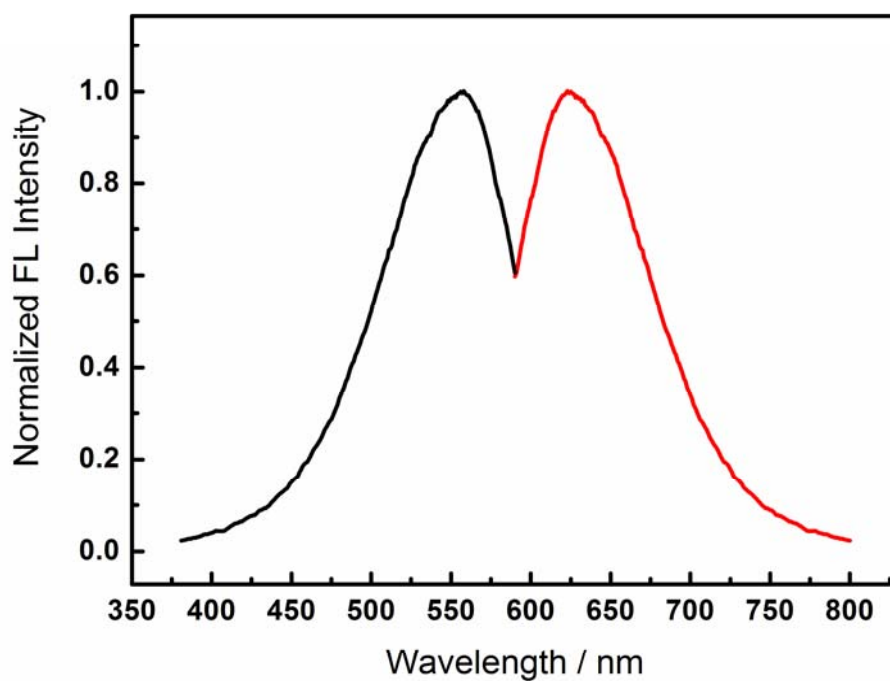

Figure S1. Excitation and emission spectra of fluorescent Ag NCs obtained using the Str-A /Str-B/Hg<sup>2+</sup> duplex as the synthetic scaffold.

### 3. UV spectra of Str-A/Str-B/Hg<sup>2+</sup> system

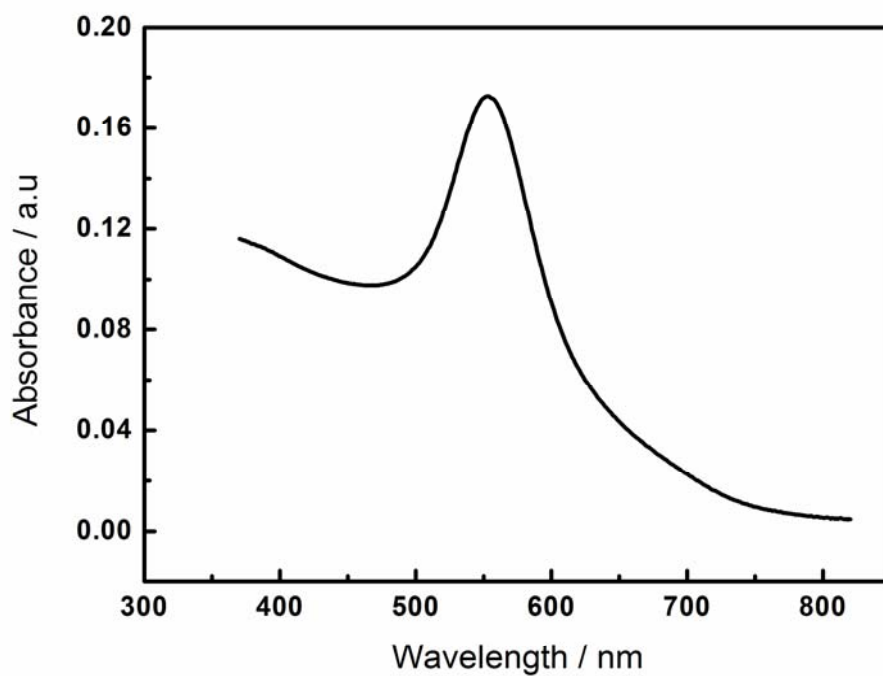

Figure S2. UV-vis spectra of fluorescent Ag NCs obtained using the Str-A/Str-B/Hg<sup>2+</sup> duplex as the synthetic scaffold.

#### 4. $T_m$ spectra of Str-A/Str-B/ $Hg^{2+}$ system

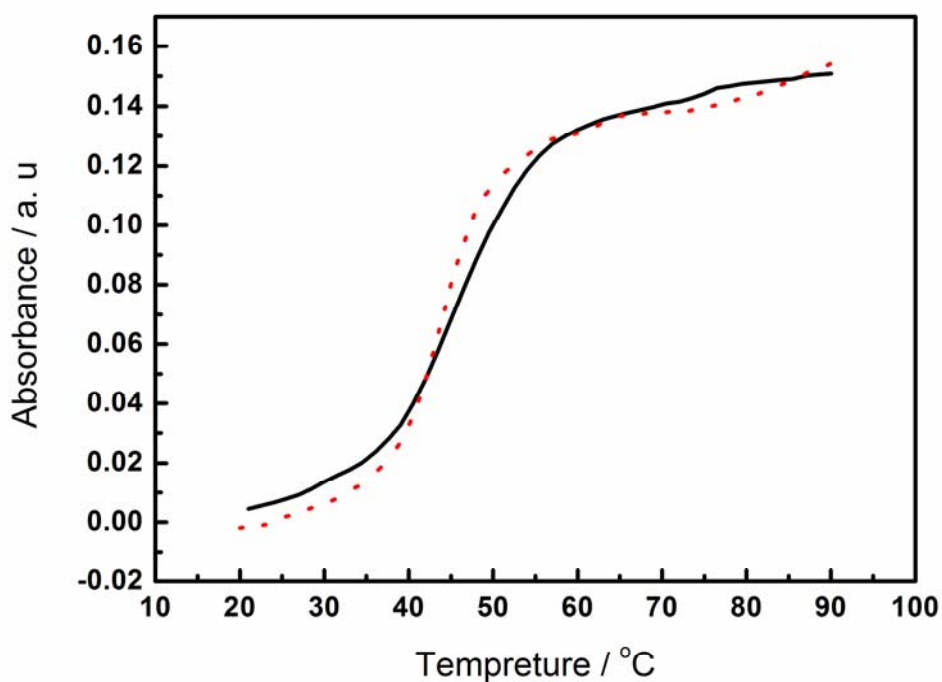

Figure S3. Relative absorbance  $A = [(A_t - A_{31}^{\circ C}) / (A_{70}^{\circ C} - A_{31}^{\circ C})]$  at 260 nm vs temperature (t) for Str-A/Str-B (black line) and Str-A /Str-B/ $Hg^{2+}$  (red dot line) duplexes (  $2\mu M$  in 20 mM phosphate buffer (pH 7.0) containing 1 mM magnesium acetate).

5. The effect of different Str-B on the fluorescence of Str-A/Str-B/Hg<sup>2+</sup> system

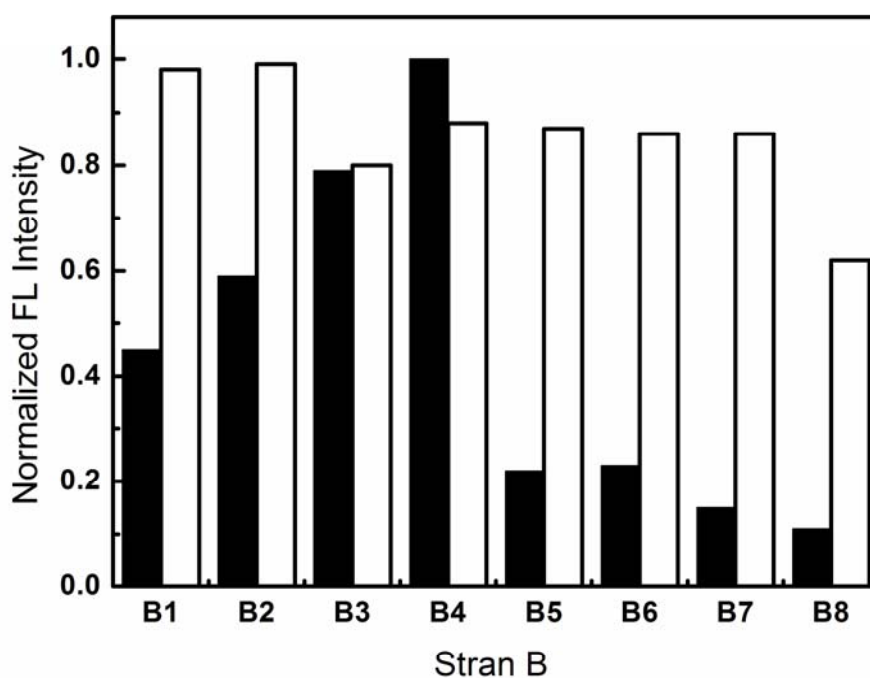

Figure S4 The normalized FL intensity in the absence (black bars) or presence (white bars) of Str-A/Str-B/Hg<sup>2+</sup> duplex in presence of 100 nM Hg<sup>2+</sup> when a different strand B was used.

**6. The effect of pH on the fluorescence of Str-A/Str-B/Hg<sup>2+</sup> system**

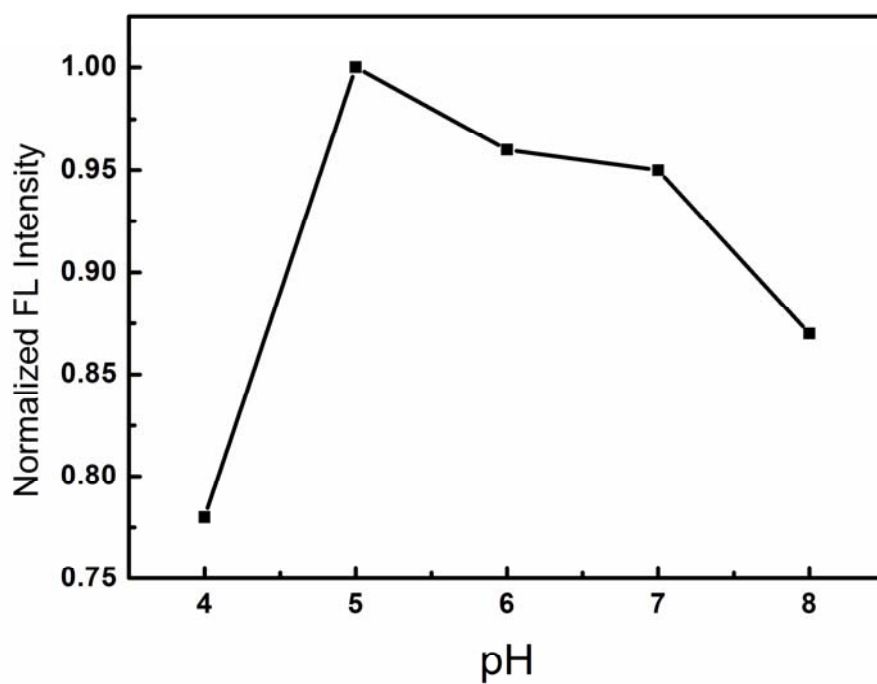

Figure S5 Influence of pH value on the generation of the fluorescence silver species in Str-A/Str-B/Hg<sup>2+</sup> duplex with 100 nM Hg<sup>2+</sup> addition.

## 7. The oligonucleotide sequences applied in this work

Table S1 The oligonucleotides used in this work

|        |                                          |
|--------|------------------------------------------|
| Str-A  | 5'-CCCACTTTCCCCCTCCTACCC                 |
| Str-A' | 5'-CCC ACT TT TCC TA CCC                 |
| Str-B  | 5'-GGG TAG AT <u>TTA</u> GTG GG          |
| Str-B1 | 5'-GGG TAG AA <u>TAA</u> GTG GG          |
| Str-B2 | 5'-GGG TAG AA A <u>TA</u> GTG GG         |
| Str-B3 | 5'-GGG TAG AA AAT <u>G</u> <u>T</u> G GG |
| Str-B4 | 5'-GGG T <u>T</u> G AA AAA GTG GG        |
| Str-B5 | 5'-GGG TAG AA <u>TTA</u> GTG GG          |
| Str-B6 | 5'-GGG TAG AT <u>T</u> <u>A</u> A GTG GG |
| Str-B7 | 5'-GGG TAG AT <u>TTA</u> GTG GG          |
| Str-B8 | 5'-GGG TAG <u>TT</u> <u>TTA</u> GTG GG   |

The underlined bold letters identify mismatched bases.



## 8. The results of the proposed method in the practical samples

Table S2 Recoveries of  $\text{Hg}^{2+}$  by utilization the proposed method in the practical samples

| Samples                     | $\text{Hg}^{2+}$ (nM) |              |
|-----------------------------|-----------------------|--------------|
|                             | Added                 | Recovery (%) |
| Lake water <sup>a</sup>     | 30                    | 105.2±3.3    |
|                             | 50                    | 106.8±3.2    |
| Tap water <sup>b</sup>      | 30                    | 101.1±2.1    |
|                             | 50                    | 102.9±1.8    |
| Purified water <sup>c</sup> | 30                    | 98.7±1.2     |
|                             | 50                    | 101.3±3.2    |
| Spring water <sup>d</sup>   | 30                    | 101.1±4.1    |
|                             | 50                    | 102.8±1.9    |

<sup>a</sup> Obtained from the south lake in ChangChun; <sup>b</sup> Obtained from the Laboratory Building;  
<sup>c</sup> Obtained from the Milli-Q water; <sup>d</sup> Obtained from the commercial “Wahaha” spring water.
